# Supplementary material for: Phytochemical Composition, Antioxidant, and Enzyme Inhibition Activities of Methanolic Extracts of Two Endemic Onosma Species
Source: MDPI journal article supplement (doi:10.3390/plants10071373), 2021-07-05
Supplement: s1 [file s1]

## **Supplementary Information**

**Table S1.** ESI–MS/MS Parameters and analytical characteristics for the Analysis of target analytes by MRM Negative and Positive Ionization Mode.

| Target compounds                     | Rt (min) | Precursor ion  | MRM1 (CE, V) | MRM2 (CE, V) |
|--------------------------------------|----------|----------------|--------------|--------------|
| <i>Compounds analyzed by NI mode</i> |          |                |              |              |
| Gallic acid                          | 8.891    | 168.9 [M – H]– | 125.0 (10)   | –            |
| Protocatechuic acid                  | 10.818   | 152.9 [M – H]– | 108.9 (12)   | –            |
| 3,4-Dihydroxyphenylacetic acid       | 11.224   | 167.0 [M – H]– | 123.0 (2)    | –            |
| (+)-Catechin                         | 11.369   | 289.0 [M – H]– | 245.0 (6)    | 202.9 (12)   |
| Pyrocatechol                         | 11.506   | 109.0 [M – H]– | 90.6 (18)    | 52.9 (16)    |
| 2,5-Dihydroxybenzoic acid            | 12.412   | 152.9 [M – H]– | 109.0 (10)   | –            |
| 4-Hydroxybenzoic acid                | 12.439   | 136.9 [M – H]– | 93.1 (14)    | –            |
| Caffeic acid                         | 12.841   | 179.0 [M – H]– | 135.0 (12)   | –            |
| Vanillic acid                        | 12.843   | 166.9 [M – H]– | 151.8 (10)   | 122.6 (6)    |
| Syringic acid                        | 12.963   | 196.9 [M – H]– | 181.9 (8)    | 152.8 (6)    |
| 3-Hydroxybenzoic acid                | 13.259   | 137.0 [M – H]– | 93.0 (6)     | –            |
| Vanillin                             | 13.397   | 151.0 [M – H]– | 136.0 (10)   | –            |
| Verbascoside                         | 13.589   | 623.0 [M – H]– | 461.0 (26)   | 160.8 (36)   |
| Taxifolin                            | 13.909   | 303.0 [M – H]– | 285.1 (2)    | 125.0 (14)   |
| Sinapic acid                         | 13.992   | 222.9 [M – H]– | 207.9 (6)    | 163.8 (6)    |
| p-Coumaric acid                      | 14.022   | 162.9 [M – H]– | 119.0 (12)   | –            |
| Ferulic acid                         | 14.120   | 193.0 [M – H]– | 177.8 (8)    | 134.0 (12)   |
| Luteolin 7-glucoside                 | 14.266   | 447.1 [M – H]– | 285.0 (24)   | –            |
| Rosmarinic acid                      | 14.600   | 359.0 [M – H]– | 196.9 (10)   | 160.9 (10)   |
| 2-Hydroxycinnamic acid               | 15.031   | 162.9 [M – H]– | 119.1 (10)   | –            |
| Pinoresinol                          | 15.118   | 357.0 [M – H]– | 151.0 (12)   | 135.7 (34)   |
| Eriodictyol                          | 15.247   | 287.0 [M – H]– | 151.0 (4)    | 134.9 (22)   |
| Quercetin                            | 15.668   | 301.0 [M – H]– | 178.6 (10)   | 151.0 (16)   |
| Kaempferol                           | 16.236   | 285.0 [M – H]– | 242.8 (16)   | 229.1 (18)   |
| <i>Compounds analyzed by PI mode</i> |          |                |              |              |
| Chlorogenic acid                     | 11.802   | 355.0 [M + H]+ | 163.0 (10)   | –            |
| (–)-Epicatechin                      | 12.458   | 291.0 [M + H]+ | 139.1 (12)   | 122.9 (36)   |
| Hesperidin                           | 14.412   | 611.1 [M + H]+ | 449.2 (4)    | 303.0 (20)   |
| Hyperoside                           | 14.506   | 465.1 [M + H]+ | 303.1 (8)    | –            |
| Apigenin 7-glucoside                 | 14.781   | 433.1 [M + H]+ | 271.0 (18)   | –            |
| Luteolin                             | 15.923   | 287.0 [M + H]+ | 153.1 (34)   | 135.1 (36)   |
| Apigenin                             | 16.382   | 271.0 [M + H]+ | 153.0 (34)   | 119.1 (36)   |

Rt, retention time; NI, negative ion; and PI, positive ion.

**Table S2.** Calibration curves and sensitivity properties of the method

| Compounds                         | Linearity and sensitivity characteristics |                       |        |                            |                            |
|-----------------------------------|-------------------------------------------|-----------------------|--------|----------------------------|----------------------------|
|                                   | Range<br>( $\mu\text{g/L}$ )              | Linear<br>equation    | $R^2$  | LOD<br>( $\mu\text{g/L}$ ) | LOQ<br>( $\mu\text{g/L}$ ) |
| Gallic acid                       | 5–500                                     | $y = 4.82x - 26.48$   | 0.9988 | 1.46                       | 4.88                       |
| Protocatechuic acid               | 2.5–<br>500                               | $y = 5.65x - 9.99$    | 0.9990 | 1.17                       | 3.88                       |
| 3,4-Dihydroxyphenylacetic<br>acid | 5–500                                     | $y = 5.13x - 12.39$   | 0.9990 | 1.35                       | 4.51                       |
| (+)-Catechin                      | 10–500                                    | $y = 1.45x + 1.95$    | 0.9974 | 3.96                       | 13.20                      |
| Pyrocatechol                      | 25–400                                    | $y = 0.11x - 0.52$    | 0.9916 | 9.62                       | 32.08                      |
| Chlorogenic acid                  | 1–500                                     | $y = 12.14x + 32.34$  | 0.9995 | 0.55                       | 1.82                       |
| 2,5-Dihydroxybenzoic acid         | 5–500                                     | $y = 3.79x - 14.12$   | 0.9980 | 2.12                       | 7.08                       |
| 4-Hydroxybenzoic acid             | 5–500                                     | $y = 7.62x + 22.79$   | 0.9996 | 1.72                       | 5.72                       |
| (-)-Epicatechin                   | 5–500                                     | $y = 9.11x - 9.99$    | 0.9971 | 1.85                       | 6.18                       |
| Caffeic acid                      | 5–500                                     | $y = 11.09x + 16.73$  | 0.9997 | 3.15                       | 10.50                      |
| Vanillic acid                     | 10–500                                    | $y = 0.49x - 1.61$    | 0.9968 | 2.56                       | 8.54                       |
| Syringic acid                     | 10–500                                    | $y = 0.74x - 1.54$    | 0.9975 | 3.75                       | 12.50                      |
| 3-Hydroxybenzoic acid             | 5–500                                     | $y = 3.69x - 12.29$   | 0.9991 | 1.86                       | 6.20                       |
| Vanillin                          | 50–500                                    | $y = 2.02x + 135.49$  | 0.9926 | 15.23                      | 50.77                      |
| Verbascoside                      | 2.5–<br>500                               | $y = 8.59x - 28.05$   | 0.9988 | 0.82                       | 2.75                       |
| Taxifolin                         | 5–500                                     | $y = 12.32x + 9.98$   | 0.9993 | 1.82                       | 6.05                       |
| Sinapic acid                      | 5–500                                     | $y = 2.09x - 6.79$    | 0.9974 | 2.64                       | 8.78                       |
| p-Coumaric acid                   | 5–500                                     | $y = 17.51x + 53.73$  | 0.9997 | 1.93                       | 6.44                       |
| Ferulic acid                      | 5–500                                     | $y = 3.32x - 4.30$    | 0.9992 | 1.43                       | 4.76                       |
| Luteolin 7-glucoside              | 1–500                                     | $y = 45.25x + 156.48$ | 0.9996 | 0.45                       | 1.51                       |
| Hesperidin                        | 5–500                                     | $y = 5.98x + 0.42$    | 0.9993 | 1.73                       | 5.77                       |
| Hyperoside                        | 2.5–<br>500                               | $y = 16.32x - 1.26$   | 0.9998 | 0.99                       | 3.31                       |

|                        |             |                      |        |      |       |
|------------------------|-------------|----------------------|--------|------|-------|
| Rosmarinic acid        | 1–500       | $y = 9.82x - 17.98$  | 0.9989 | 0.57 | 1.89  |
| Apigenin 7-glucoside   | 1–500       | $y = 21.33x - 31.69$ | 0.9983 | 0.41 | 1.35  |
| 2-Hydroxycinnamic acid | 1–500       | $y = 16.72x - 26.94$ | 0.9996 | 0.61 | 2.03  |
| Pinoresinol            | 10–500      | $y = 0.80x - 2.69$   | 0.9966 | 3.94 | 13.12 |
| Eriodictyol            | 2.5–<br>500 | $y = 14.24x - 0.50$  | 0.9998 | 0.80 | 2.68  |
| Quercetin              | 5–500       | $y = 14.68x - 18.25$ | 0.9997 | 1.23 | 4.10  |
| Luteolin               | 5–500       | $y = 8.96x + 26.80$  | 0.9992 | 1.34 | 4.46  |
| Kaempferol             | 10–500      | $y = 0.82x - 3.06$   | 0.9959 | 3.30 | 10.99 |
| Apigenin               | 2.5–<br>500 | $y = 11.29x + 38.05$ | 0.9987 | 0.96 | 3.20  |

LOD and LOQ: limit of detection and limit of quantification, respectively.
